# Supplementary material for: RITA (Reactivating p53 and Inducing Tumor Apoptosis) is efficient against TP53abnormal myeloma cells independently of the p53 pathway
Source: PubMed Central journal article supplement (PMC4094448; doi:10.1186/1471-2407-14-437), 2014-06-14
Supplement: 1471-2407-14-437-S1.pdf [file 1471-2407-14-437-S1.pdf]

Figure S1

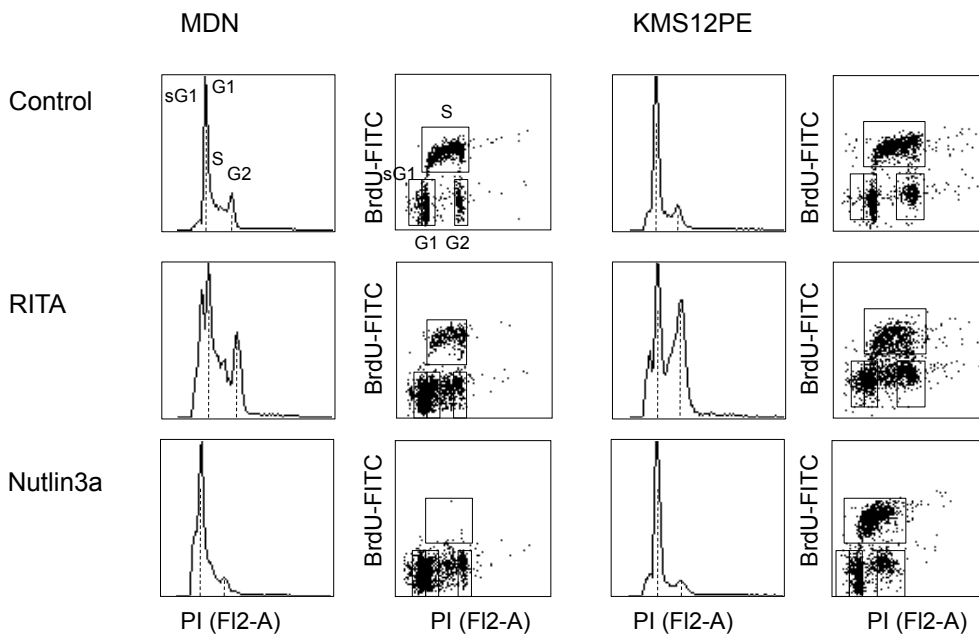

|       | Control | RITA | Nutlin3a | Control | RITA | Nutlin3a |
|-------|---------|------|----------|---------|------|----------|
| subG1 | 1.6     | 35.4 | 29.4     | 1.7     | 12.6 | 2.6      |
| G1    | 49.4    | 19.7 | 42.7     | 42.9    | 23.0 | 45.6     |
| S     | 35.6    | 18.2 | 0.1      | 40.2    | 35.9 | 36.2     |
| G2    | 9.0     | 8.7  | 14.3     | 13.2    | 21.2 | 18.7     |
| G1-G2 | 1.4     | 18.0 | 13.4     | 2.0     | 7.2  | 0        |

Figure S1. The cell cycle was analyzed by BrdU and PI staining 24 h after RITA (100 nM) or nutlin3a (5  $\mu$ M for MDN, 10  $\mu$ M for KMS12PE) addition (see materials and methods). One representative experiment out of 2 is shown.
